# Supplementary material for: Human Y chromosome haplogroup L1-M22 traces Neolithic expansion in West Asia and supports the Elamite and Dravidian connection
Source: PubMed Central journal article supplement (PMC11177204; doi:10.1016/j.isci.2024.110016), 2024-05-17

**Supplemental information**

**Human Y chromosome haplogroup L1-M22**

**traces Neolithic expansion in West Asia**

**and supports the Elamite and Dravidian connection**

**Ajai Kumar Pathak, Hovann Simonian, Ibrahim Abdel Aziz Ibrahim, Peter Hrechdakian, Doron M. Behar, Qasim Ayub, Pakhrudin Arsanov, Ene Metspalu, Levon Yepiskoposyan, Siiri Rootsi, Phillip Endicott, Richard Villems, and Hovhannes Sahakyan**



Figure S2. MCC tree with collapsed branches and ancient samples, related to Figures 2, S1, and S3 and Table S5

The MCC tree depicts the evolutionary relationships among Y chromosome sequences, with specific branches collapsed to enhance clarity. Ancient samples are denoted by diamond symbols and are positioned on the tree according to their estimated ages. Dashed lines connect each ancient sample to the specific branch it is inferred to affiliate with, as determined by the PathPhynder software. To improve visibility and prevent overlap, jitter has been applied to the diamond symbols, introducing a subtle random displacement along the vertical axis.

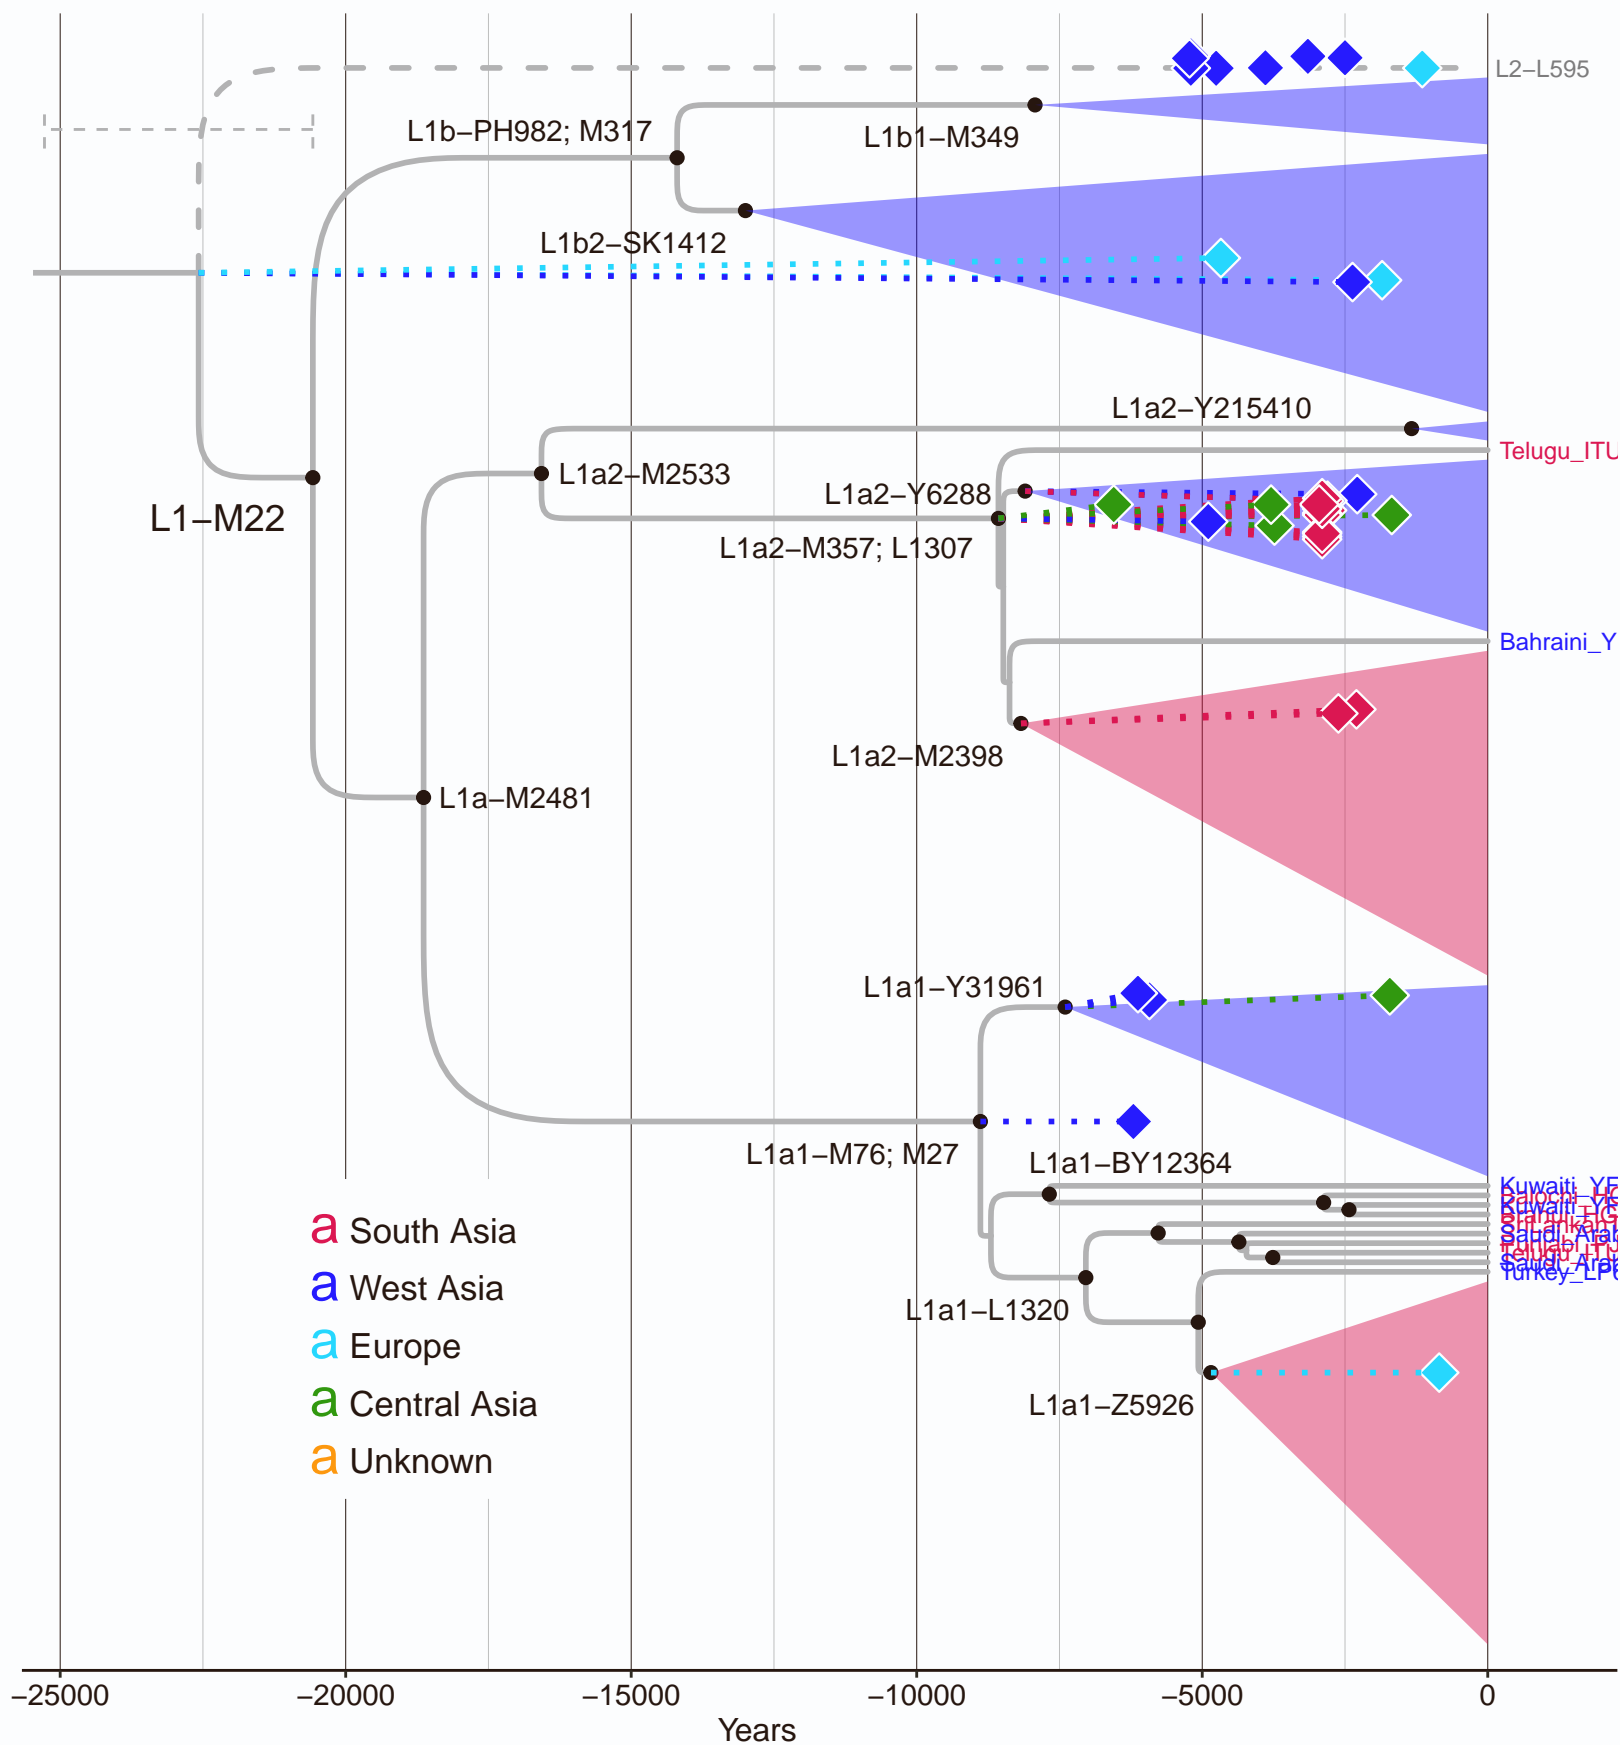

Supplement: mmc1.pdf [file mmc1.pdf]
